# Supplementary material for: Effect of yttrium content in the La2−xYxMgNi9 battery anode alloys on the structural, hydrogen storage and electrochemical properties
Source: Royal Society of Chemistry journal article supplement (doi:10.1039/d2dt01957d), 2022-01-01
Supplement: d2dt01957d1.pdf [file d2dt01957d1.pdf]

## SUPPLEMENTARY INFORMATION TO THE MANUSCRIPT

### Effect of yttrium Content in the $\text{La}_{2-x}\text{Y}_x\text{MgNi}_9$ Battery Anode Alloys on the Structural, Hydrogen Storage and Electrochemical Properties

ChuBin Wan <sup>a, b</sup>, R.V. Denys <sup>b, c</sup> and V.A.Yartys <sup>b\*</sup>

<sup>a</sup> University of Science and Technology Beijing, 100083, China

<sup>b</sup> Institute for Energy Technology, P.O. Box 40, Kjeller NO-2027, Norway

<sup>c</sup> HYSTORSYS AS, P.O. Box 45, Kjeller NO-2027, Norway

**Table S1.**

Atomic parameters for  $\text{La}_{1.75}\text{Y}_{0.25}\text{MgNi}_9$  compound (PuNi<sub>3</sub>-type).

| Atom       | Wyckoff site | $x/a$     | $y/b$ | $z/c$     | Occupancy              |
|------------|--------------|-----------|-------|-----------|------------------------|
| (La/Y)1    | 3a           | 0         | 0     | 0         | 0.96(1)/0.04(1)        |
| (La/Y/Mg)2 | 6c           | 0         | 0     | 0.1465(1) | 0.40(1)/0.10(1)/0.5(-) |
| Ni1        | 3b           | 0         | 0     | 1/2       | 1.0(-)                 |
| Ni2        | 6c           | 0         | 0     | 0.3270(2) | 1.0(-)                 |
| Ni3        | 18h          | 0.4986(4) | -x    | 0.0826(1) | 1.0(-)                 |

$U_{iso}$  for all atoms is set to  $0.01 \text{ \AA}^2$  and not refined.

**Table S2.**

Atomic parameters for  $\text{La}_{1.5}\text{Y}_{0.5}\text{MgNi}_9$  compound (PuNi<sub>3</sub>-type).

| Atom       | Wyckoff site | $x/a$     | $y/b$ | $z/c$     | Occupancy              |
|------------|--------------|-----------|-------|-----------|------------------------|
| (La/Y)1    | 3a           | 0         | 0     | 0         | 0.81(2)/0.19(2)        |
| (La/Y/Mg)2 | 6c           | 0         | 0     | 0.1491(2) | 0.34(1)/0.16(1)/0.5(-) |
| Ni1        | 3b           | 0         | 0     | 1/2       | 1.0(-)                 |
| Ni2        | 6c           | 0         | 0     | 0.3289(2) | 1.0(-)                 |
| Ni3        | 18h          | 0.4976(4) | -x    | 0.0829(2) | 1.0(-)                 |

$U_{iso}$  for all atoms is set to  $0.01 \text{ \AA}^2$  and not refined.

**Table S3.**

Atomic parameters for  $\text{La}_{1.25}\text{Y}_{0.75}\text{MgNi}_9$  compound (PuNi<sub>3</sub>-type).

| Atom       | Wyckoff site | $x/a$     | $y/b$ | $z/c$     | Occupancy                |
|------------|--------------|-----------|-------|-----------|--------------------------|
| (La/Y)1    | 3a           | 0         | 0     | 0         | 0.726(5)/0.274(5)        |
| (La/Y/Mg)2 | 6c           | 0         | 0     | 0.1430(1) | 0.276(6)/0.233(6)/0.5(-) |
| Ni1        | 3b           | 0         | 0     | 1/2       | 1.0(-)                   |
| Ni2        | 6c           | 0         | 0     | 0.3325(1) | 1.0(-)                   |
| Ni3        | 18h          | 0.5008(3) | -x    | 0.0836(1) | 1.0(-)                   |

$U_{iso}$  for all atoms is set to  $0.01 \text{ \AA}^2$  and not refined.

**Table S4.**

Crystallographic data for  $\text{La}_{2.25}\text{Y}_{0.75}\text{MgNi}_{14}\text{D}_{18}$  from Rietveld refinement of NPD data.

Space group  $R\bar{3}m$ ;  $a = 5.3762(9) \text{ \AA}$ ,  $c = 39.41(1) \text{ \AA}$ ,  $V = 986.4(4) \text{ \AA}^3$ .

| Atom       | Wyckoff site | $x/a$    | $y/b$ | $z/c$    | $U_{iso} (\text{\AA}^2)$ | Occupancy          |
|------------|--------------|----------|-------|----------|--------------------------|--------------------|
| (La/Y)1    | 6c           | 0        | 0     | 0.043(-) | 0.01                     | 0.75/0.25(-)       |
| (La/Y)2/Mg | 6c           | 0        | 0     | 0.153(-) | 0.01                     | 0.375/0.125/0.5(-) |
| Ni1        | 18h          | 0.507(-) | -x    | 0.110(-) | 0.01                     | 1.0(-)             |
| Ni2        | 9e           | 0.5      | 0     | 0        | 0.01                     | 1.0(-)             |
| Ni3        | 6c           | 0        | 0     | 0.277(-) | 0.01                     | 1.0(-)             |
| Ni4        | 6c           | 0        | 0     | 0.392(-) | 0.01                     | 1.0(-)             |
| Ni5        | 3b           | 0        | 0     | 0.5      | 0.01                     | 1.0(-)             |
| D1         | 6c           | 0        | 0     | 0.316(-) | 0.02                     | 0.37(-)            |
| D2         | 18h          | 0.499(-) | -x    | 0.046(-) | 0.02                     | 0.75(-)            |
| D3         | 18h          | 0.157(-) | -x    | 0.110(-) | 0.02                     | 0.49(-)            |
| D4         | 6c           | 0        | 0     | 0.345(-) | 0.02                     | 0.45(-)            |
| D5         | 18h          | 0.849(-) | -x    | 0.100(-) | 0.02                     | 0.48(-)            |
| D6         | 6c           | 0        | 0     | 0.205(-) | 0.02                     | 0.48(-)            |
| D7         | 18h          | 0.908(-) | -x    | 0.197(-) | 0.02                     | 0.27(-)            |
| D8         | 6c           | 0        | 0     | 0.456(-) | 0.02                     | 0.47(-)            |
| D9         | 18h          | 0.491(-) | -x    | 0.149(-) | 0.02                     | 0.46(-)            |

**Table S5.**

Interatomic distances and sites of occupied interstices in structure of  $\text{La}_{1.5}\text{Y}_{0.5}\text{MgNi}_9\text{D}_{12.4}$  and  $\text{La}_2\text{MgNi}_9\text{D}_{13}$  [1].

|                           | <b><math>\text{La}_{1.5}\text{Y}_{0.5}\text{MgNi}_9\text{D}_{12.4}</math></b> |                           |                                                                                                                                       | <b><math>\text{La}_2\text{MgNi}_9\text{D}_{13}</math> [1]</b> |                           |                                                                                                                                              |
|---------------------------|-------------------------------------------------------------------------------|---------------------------|---------------------------------------------------------------------------------------------------------------------------------------|---------------------------------------------------------------|---------------------------|----------------------------------------------------------------------------------------------------------------------------------------------|
| <b>Slab</b>               | Atoms                                                                         | Distance <sup>a</sup> (Å) | Interstitial site                                                                                                                     | Atoms                                                         | Distance <sup>a</sup> (Å) | Interstitial site                                                                                                                            |
| <b>RENi<sub>5</sub></b>   | D1...RE1                                                                      | 2.54(1)                   | 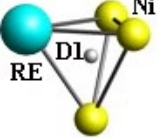<br>Tetrahedron<br>RENi <sub>3</sub>                 | D1...2 La1                                                    | 2.758(2)                  | <br>Tetragonal pyramid<br>La <sub>2</sub> Ni <sub>3</sub> |
|                           | D1...Ni2                                                                      | 1.62(2)                   |                                                                                                                                       | D1...Ni2                                                      | 1.62(2)                   |                                                                                                                                              |
|                           | D1...Ni2                                                                      | 1.67(2)                   |                                                                                                                                       | D1...Ni2                                                      | 1.68(2)                   |                                                                                                                                              |
|                           | D1...Ni3                                                                      | 1.75(1)                   |                                                                                                                                       | D1...Ni3                                                      | 1.69(1)                   |                                                                                                                                              |
|                           | D1...D1                                                                       | 0.38(3)                   |                                                                                                                                       | D1...D1                                                       | 1.05(2)                   |                                                                                                                                              |
|                           | D1...D2                                                                       | 0.97(2)                   |                                                                                                                                       | D1...D2                                                       | 1.79(2)                   |                                                                                                                                              |
|                           | D1...D3                                                                       | 1.04(3)                   |                                                                                                                                       |                                                               |                           |                                                                                                                                              |
|                           | D2...Ni2                                                                      | 1.55(4)                   | <br>Tetrahedron<br>Ni <sub>4</sub>                   | D2...Ni2                                                      | 1.57(3)                   | <br>Tetrahedron<br>Ni <sub>4</sub>                        |
| D2...3 Ni3                | 1.74(2)                                                                       | D2...3 Ni3                |                                                                                                                                       | 1.69(1)                                                       |                           |                                                                                                                                              |
| D2...6 D1                 | 1.75(3)                                                                       | D2...3 D1                 |                                                                                                                                       | 1.79(2)                                                       |                           |                                                                                                                                              |
| D2...3 D3                 | 1.77(4)                                                                       | D2...3 D3                 |                                                                                                                                       | 1.92(3)                                                       |                           |                                                                                                                                              |
| <b>Interslab Boundary</b> | D3...RE1                                                                      | 2.77(3)                   | <br>Tetrahedron<br>RE <sub>2</sub> Ni <sub>2</sub>   | D3...La1                                                      | 2.61(3)                   | <br>Tetrahedron<br>La(La/Mg)Ni <sub>2</sub>               |
|                           | D3...Mg/RE2                                                                   | 2.19(3)                   |                                                                                                                                       | D3...Mg/La2                                                   | 2.15(3)                   |                                                                                                                                              |
|                           | D3...2 Ni3                                                                    | 1.54(2)                   |                                                                                                                                       | D3...2 Ni3                                                    | 1.66(2)                   |                                                                                                                                              |
|                           | D3...D2                                                                       | 1.77(4)                   |                                                                                                                                       | D3...D2                                                       | 1.92(3)                   |                                                                                                                                              |
|                           | D3...2 D4                                                                     | 1.56(2)                   | D3...2 D4                                                                                                                             | 1.36(1)                                                       |                           |                                                                                                                                              |
|                           | D3...2 D6                                                                     | 1.70(2)                   | D3...2 D6                                                                                                                             | 1.93(2)                                                       |                           |                                                                                                                                              |
|                           | D3...D8                                                                       | 1.61(4)                   | D3...D8                                                                                                                               | 1.90(4)                                                       |                           |                                                                                                                                              |
|                           | D4...RE1                                                                      | 2.44(2)                   | <br>Tetrahedron<br>RE <sub>2</sub> Ni <sub>2</sub> | D4...La1                                                      | 2.62(1)                   | <br>Tetrahedron<br>La(La/Mg)Ni <sub>2</sub>             |
|                           | D4...Mg/RE2                                                                   | 2.39(1)                   |                                                                                                                                       | D4...Mg/La2                                                   | 2.15(1)                   |                                                                                                                                              |
|                           | D4...2 Ni3                                                                    | 1.619(7)                  |                                                                                                                                       | D4...2 Ni3                                                    | 1.68(1)                   |                                                                                                                                              |
|                           | D4...2 D3                                                                     | 1.56(2)                   |                                                                                                                                       | D4...2 D3                                                     | 1.36(1)                   |                                                                                                                                              |
|                           | D4...D6                                                                       | 0.69(2)                   |                                                                                                                                       | D4...D6                                                       | 1.07(2)                   |                                                                                                                                              |
|                           |                                                                               |                           | D4...D7                                                                                                                               | 1.80(2)                                                       |                           |                                                                                                                                              |

|                                   |                                          |                                                                                                                      |                                                                                                                                               |                                                                                           |                                                                                                                        |                                                                                                                                              |
|-----------------------------------|------------------------------------------|----------------------------------------------------------------------------------------------------------------------|-----------------------------------------------------------------------------------------------------------------------------------------------|-------------------------------------------------------------------------------------------|------------------------------------------------------------------------------------------------------------------------|----------------------------------------------------------------------------------------------------------------------------------------------|
| <b>REMgNi<sub>4</sub></b>         | D5...3 Mg/RE2<br>D5...Ni1<br>D5...Ni3    | 1.92(1)<br>1.686(8)<br>1.591(8)                                                                                      | 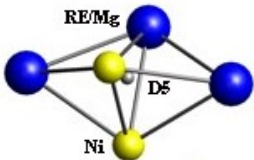<br>Trigonal bipyramid (RE/Mg) <sub>3</sub> Ni <sub>2</sub> | D5...2 Mg/La2<br>D5...Mg/La2<br>D5...Ni1<br>D5...Ni3<br>D5...2 D5<br>D5...2 D6<br>D5...D8 | 2.711(1)<br>1.97(1)<br>1.52(1)<br>1.74(1)<br>1.73(1)<br>1.70(1)<br>1.77(1)                                             | <br>Trigonal pyramid (La/Mg) <sub>3</sub> Ni <sub>2</sub> |
|                                   | D6...Mg/RE2<br>D6...Mg/RE2<br>D6...2 Ni3 | 2.17(2)<br>2.76(2)<br><b>1.500(9)</b>                                                                                | <br>Tetrahedron<br>RE <sub>2</sub> Ni <sub>2</sub>           | D6...Mg/La2<br>D6...Mg/La2<br>D6...2 Ni3                                                  | 2.03(1)<br>2.17(3)<br>1.73(1)                                                                                          | <br>Tetrahedron<br>MgLaNi <sub>2</sub>                    |
|                                   | D6...2 D3<br>D6...D4<br>D6...2 D5        | 1.70(2)<br>0.69(2)<br>1.90(2)                                                                                        |                                                                                                                                               | D6...2 D3<br>D6...D4<br>D6...2 D5<br>D6...D7                                              | 1.93(2)<br>1.07(2)<br>1.70(1)<br>1.34(4)                                                                               |                                                                                                                                              |
|                                   | vacant                                   | vacant                                                                                                               | vacant                                                                                                                                        | D7...Mg/La2<br>D7...3 Ni3                                                                 | 2.33(9)<br>1.65(2)                                                                                                     | <br>Tetrahedron<br>(La/Mg)Ni <sub>3</sub>                 |
| D8...Ni1<br>D8...3 Ni3            | 1.62(2)<br>1.63(1)                       | <br>Tetrahedron<br>Ni <sub>4</sub> | D8...Ni1<br>D8...3 Ni3                                                                                                                        | 1.52(1)<br>1.685(6)                                                                       | <br>Tetrahedron<br>Ni <sub>4</sub> |                                                                                                                                              |
| D8...D2<br>D8...3 D3<br>D8...3 D5 | 1.38(4)<br>1.61(4)<br>1.89(2)            |                                                                                                                      | D8...D2<br>D8...3 D3<br>D8...3 D5                                                                                                             | 1.42(3)<br>1.90(4)<br>1.77(1)                                                             |                                                                                                                        |                                                                                                                                              |

La and Y are labelled as RE (rare earth metals) in in structure of La<sub>1.5</sub>Y<sub>0.5</sub>MgNi<sub>9</sub>D<sub>12.4</sub>. <sup>a</sup> Table provides the values of the shortest distances between neighboring D sites (1.0–1.9 Å). Such D sites are never simultaneously filled; minimum distance between the neighboring D atoms in the structure exceeds 2 Å.

[1] R.V. Denys, V.A. Yartys, C.J. Webb, Hydrogen in La<sub>2</sub>MgNi<sub>9</sub>D<sub>13</sub>: The Role of Magnesium, Inorg. Chem., 51 (2012) 4231-4238.

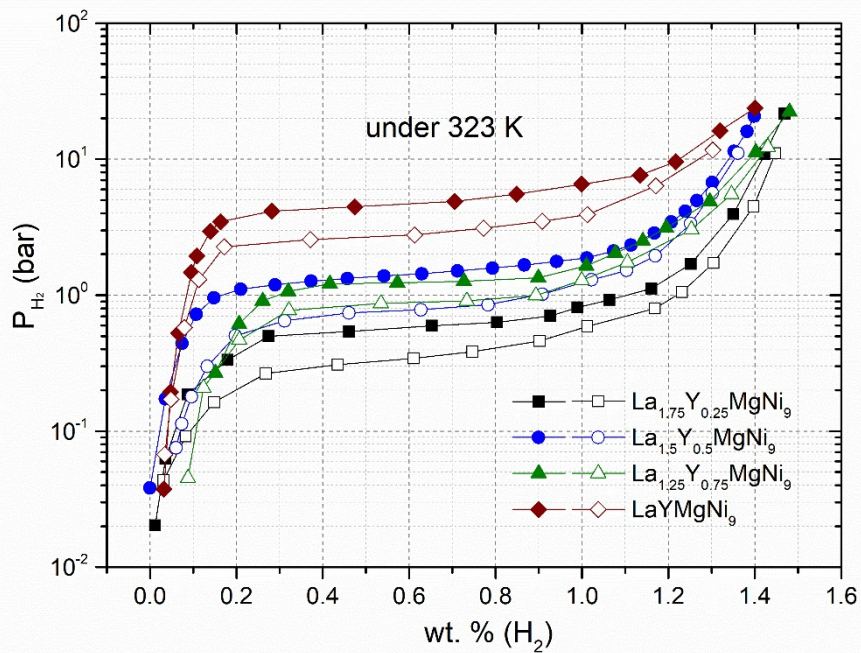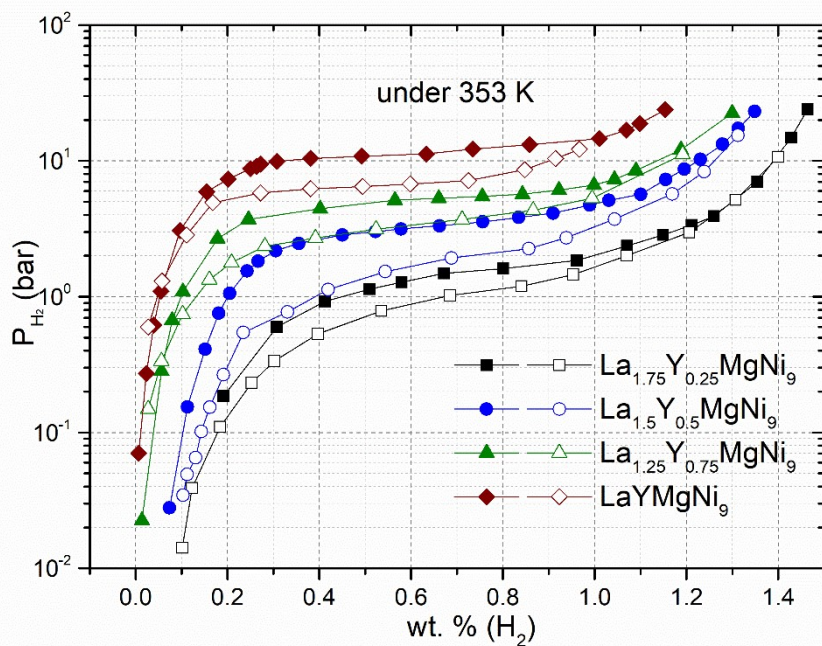

Fig. S1. Absorption-desorption isotherms measured for the  $\text{La}_{2-x}\text{Y}_x\text{MgNi}_9\text{-H}_2$  system at  $50^\circ\text{C}$  and  $80^\circ\text{C}$ .  
Absorption: filled symbols; Desorption: open symbols.

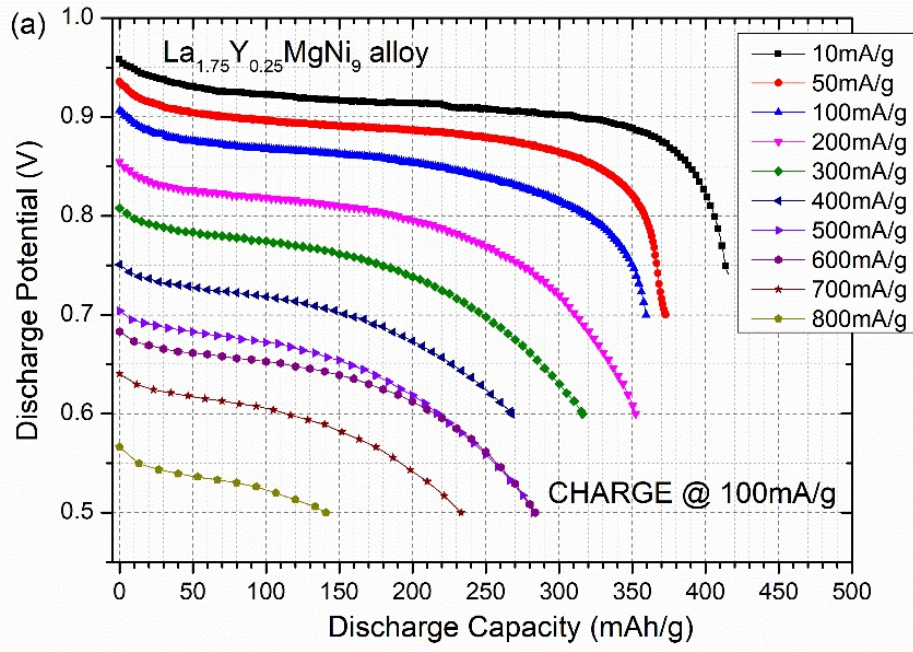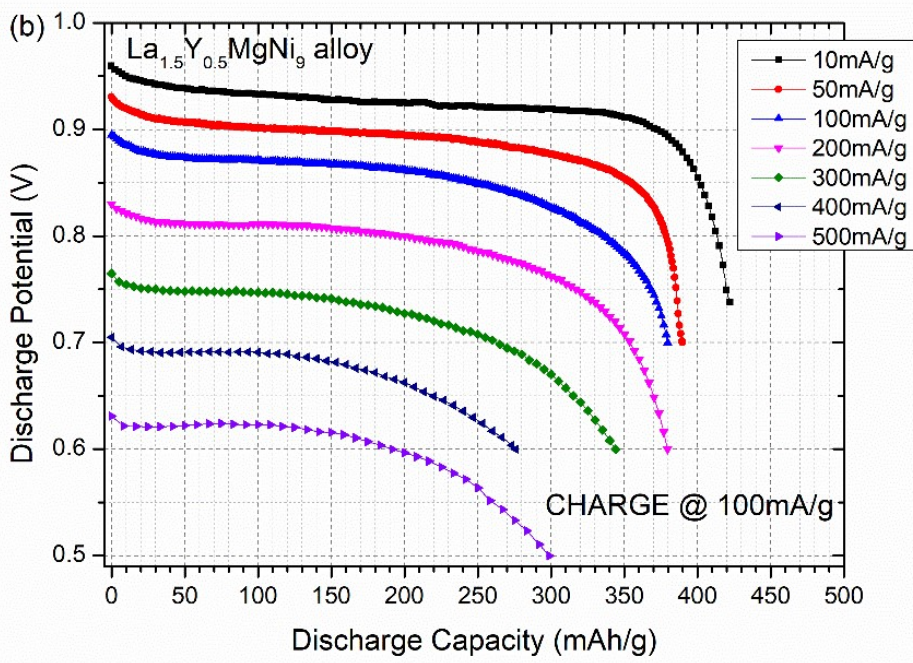

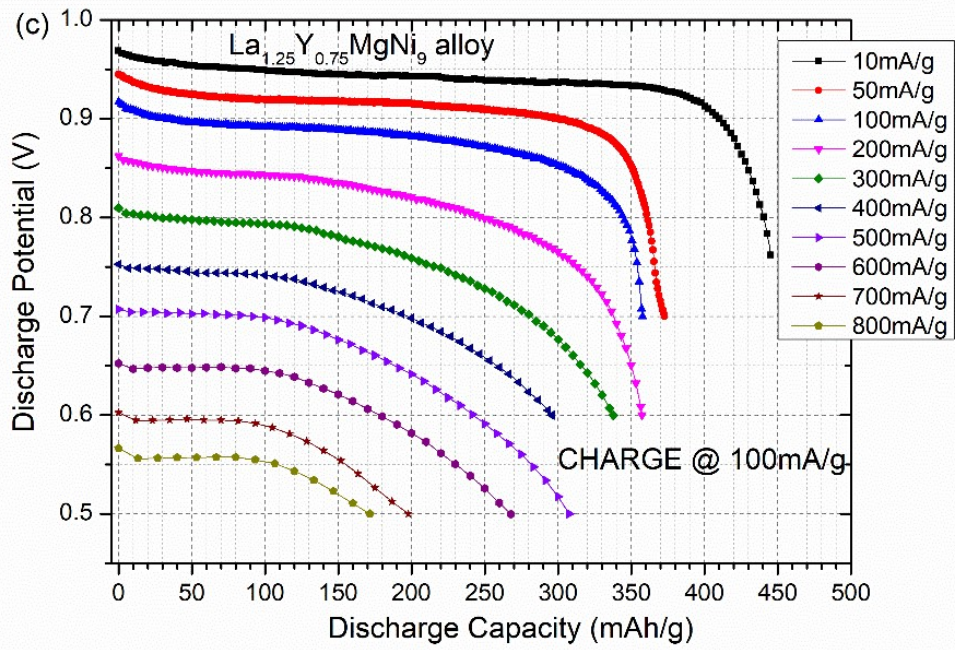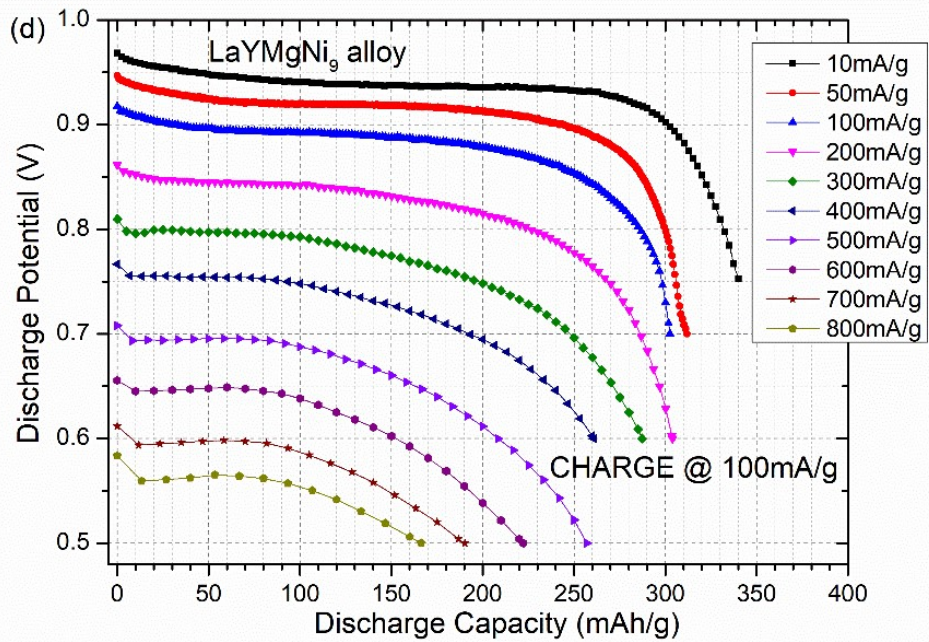

Fig. S2. Discharge capacities of the  $\text{La}_{2-x}\text{Y}_x\text{MgNi}_9$  alloy electrodes as a function of applied current densities. All electrodes were charged at a current density of 100 mA/g before the discharge experiments.
